# Supplementary material for: Benchmarking various types of partial atomic charges for classical all-atom simulations of metal–organic frameworks
Source: Royal Society of Chemistry journal article supplement (doi:10.1039/d2nr00354f), 2022-01-01
Supplement: d2nr00354f1.pdf [file d2nr00354f1.pdf]

## Supplemental Materials: Benchmarking Various Types of Partial Atomic Charges for Classical All-Atom Simulations of Metal-Organic Frameworks

Sizhe Liu<sup>1</sup> and Binquan Luan<sup>1</sup>

<sup>1</sup>IBM Thomas J. Watson Research Center, Yorktown Heights, New York 10598, USA

### I. SIX-LETTER NAMES FROM THE CORE2019 DATABASE FOR THE 181 MOFS

| indices | names    | indices | names    | indices | names    |
|---------|----------|---------|----------|---------|----------|
| 001     | ABAVIJ   | 051     | FEFDAX   | 101     | NAKLIW   |
| 002     | ADABUE   | 052     | FEWTUY   | 102     | NEJRUR   |
| 003     | ADAXEK   | 053     | FOHCIP   | 103     | NEJSEC   |
| 004     | AFOYOK   | 054     | FUTDII   | 104     | NEVVAM   |
| 005     | ANOMUM   | 055     | GELJAJ   | 105     | NIHQI01  |
| 006     | ATIJUJ   | 056     | GELVID01 | 106     | NOFHUM   |
| 007     | AVAQIX   | 057     | GMSIG    | 107     | OCAQOY   |
| 008     | AVELOD   | 058     | GIZVER   | 108     | OFAWEZ   |
| 009     | AVEMAQ   | 059     | HAJLEK   | 109     | OHAQEU   |
| 010     | AWAGEL   | 060     | HAJLIO   | 110     | OPIWEQ   |
| 011     | BAHGUN01 | 061     | HAJLOU   | 111     | PAPPED   |
| 012     | BAHGUN04 | 062     | HAJLUA   | 112     | PEFRID   |
| 013     | BAHGUN   | 063     | HEGJUZ   | 113     | PELGOE   |
| 014     | BARZAW   | 064     | HEKTUO   | 114     | PESTUD   |
| 015     | BARZOK   | 065     | HFTOG02  | 115     | PEWXUL01 |
| 016     | BASTEW   | 066     | ICAGOK   | 116     | PEWXUL   |
| 017     | BEPVEZ   | 067     | IFENYO   | 117     | PEXBIF   |
| 018     | BEZSIK   | 068     | ILUJEF   | 118     | PEYSIW   |
| 019     | BIHMUC   | 069     | IQUNAJ01 | 119     | PIJJOI   |
| 020     | BURJOO   | 070     | ISIKIF   | 120     | PURJIW   |
| 021     | BUSQEM   | 071     | ITETEH   | 121     | QEBGAH   |
| 022     | BUVXOG   | 072     | IVETOT   | 122     | QOKCID   |
| 023     | BUVYEX   | 073     | IXEQIL   | 123     | QOPHEI   |
| 024     | BUVYIB   | 074     | JASNAT   | 124     | QUPJAN   |
| 025     | CAHSOU   | 075     | JASNEX   | 125     | QUPZAC   |
| 026     | CAVSUP   | 076     | KANDIO   | 126     | RETBEZ   |
| 027     | CAXVII   | 077     | KENJEU   | 127     | RIBDEN   |
| 028     | CAXVOO   | 078     | KEVWUF   | 128     | SAXFII   |
| 029     | CAXVUU   | 079     | KIDDOS   | 129     | SETSIV   |
| 030     | CAXWAB   | 080     | KIFWUT   | 130     | SOWYOS   |
| 031     | CAXWIJ   | 081     | KUXLUL   | 131     | SUJQOE   |
| 032     | CAYSOK   | 082     | LAGHIL   | 132     | SUJREV   |
| 033     | CEGDUO   | 083     | LAGWEX   | 133     | TAGSEB   |
| 034     | CESYEF01 | 084     | LEDCAA   | 134     | TARVOX   |
| 035     | CITXUZ   | 085     | LEGGOU   | 135     | TEQPAI   |
| 036     | CUGLTM01 | 086     | LEPLEZ   | 136     | TEQVAO   |
| 037     | CUGLTM   | 087     | LERNEC01 | 137     | TESHAB   |
| 038     | CUVTUJ   | 088     | LERNEC   | 138     | TETZID   |
| 039     | DAGDUL   | 089     | LOLQIM   | 139     | TEWGEJ01 |
| 040     | DAWBOU   | 090     | LUKRUE   | 140     | TIRRIW   |
| 041     | DAWCAH   | 091     | LUMDEC   | 141     | TOLGOR   |
| 042     | DAXHIV01 | 092     | LUPTAS   | 142     | TUTZOX   |
| 043     | DAXHIV   | 093     | MABJUV01 | 143     | UBACOR   |
| 044     | DAXHUH   | 094     | MABKEG   | 144     | UKULOB   |
| 045     | DIDBEZ   | 095     | MATTOR   | 145     | UMELUU   |
| 046     | DIZQOT   | 096     | MATTUX   | 146     | UNABUH01 |
| 047     | DOKHOB   | 097     | MEHPAQ   | 147     | UNABUH   |
| 048     | EBIHII   | 098     | MIZJUB   | 148     | UNACIW   |
| 049     | FAKGOP   | 099     | MOYYIJ   | 149     | UWUTIQ   |
| 050     | FECZAQ   | 100     | MUWQEB   | 150     | VAGTAA   |

| indices | names    |
|---------|----------|
| 151     | VAQLEG   |
| 152     | VONBIK   |
| 153     | WAFKAQ   |
| 154     | WAHMEY01 |
| 155     | WEJSAH   |
| 156     | WEYMIY   |
| 157     | WEZCIO   |
| 158     | WODFOL   |
| 159     | WOHBIF   |
| 160     | WOLMUG   |
| 161     | WUTBES   |
| 162     | XACZEH   |
| 163     | XAMDUM04 |
| 164     | XAMDUM05 |
| 165     | XAMDUM   |
| 166     | XAPSOY   |
| 167     | XAPYAO   |
| 168     | XAWZOM   |
| 169     | XEJWUG   |
| 170     | XIMPOA   |
| 171     | XINRAP   |
| 172     | XOKHAH   |
| 173     | XUCNOZ   |
| 174     | XUMFIV   |
| 175     | XUVHEB   |
| 176     | YACHUH   |
| 177     | YARSAN   |
| 178     | YEZKIZ   |
| 179     | YUCNEQ   |
| 180     | YUWKIL   |
| 181     | ZEDROR   |

## II. THE STATISTICAL AND PHYSICAL INFORMATION OF THE 181 MOFS

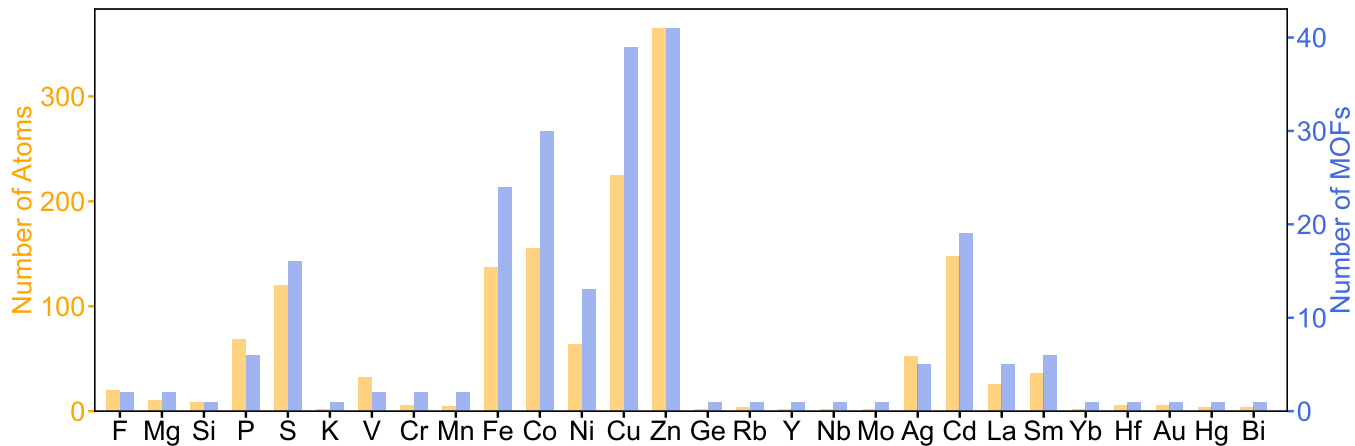

FIG. S1: The frequencies of the different elements in the 181 MOFs (orange bars) and the number of MOFs containing each element (blue bars). H, C, N and O are excluded from the graph, and their counts are 9977, 13873, 2418, and 4462, respectively.

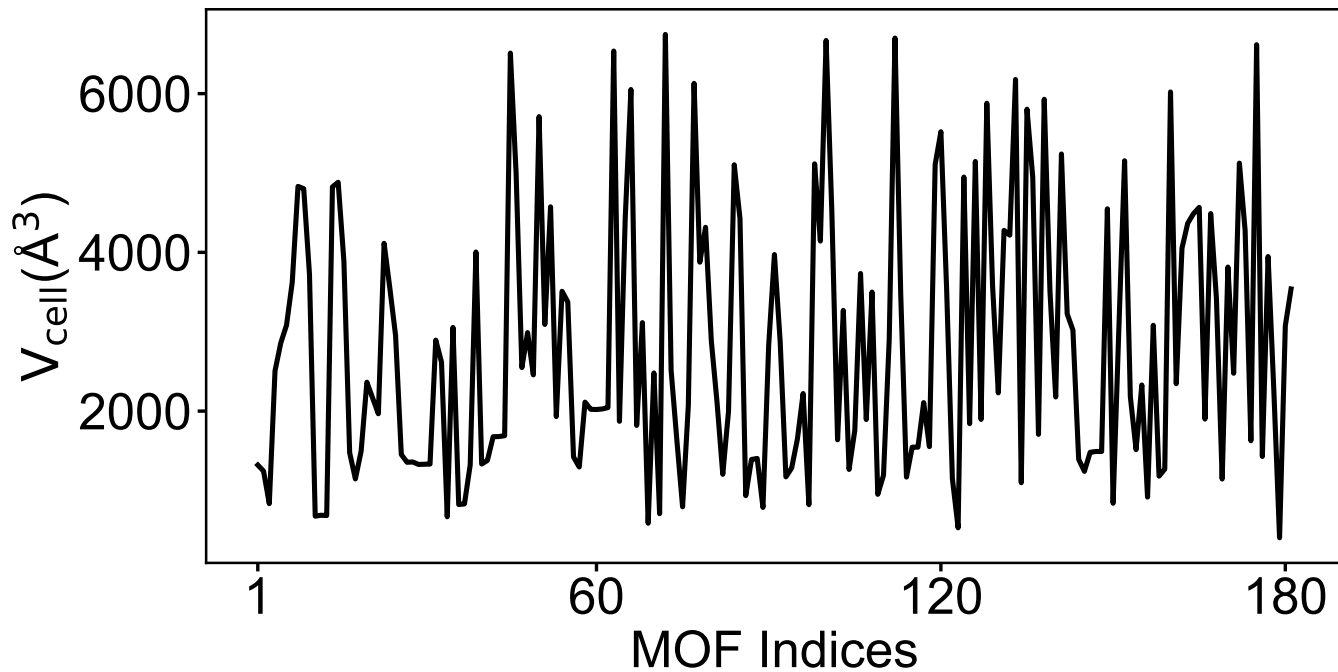

FIG. S2: The primitive cell volumes  $V_{cell}$  versus the MOF indices.

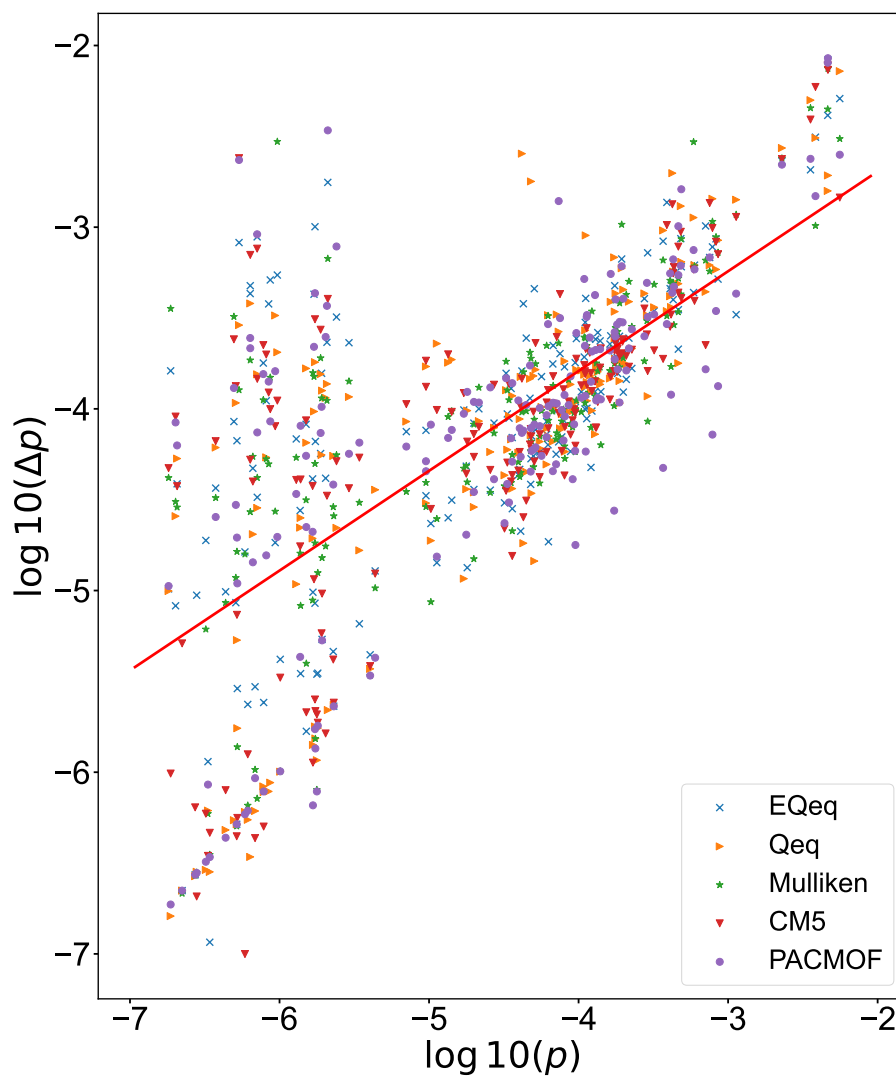

FIG. S3: The calculated  $\Delta p$  for the 181 MOFs are plotted against  $p$ , where points based on different charges are labelled using the distinct markers. All the data points are fitted to a red line, which indicates a linear correlation between  $\log_{10}(p)$  and  $\log_{10}(\Delta p)$  when  $p > 10^{-4} e\text{\AA}^{-2}$ .

III.  $|\Delta p|$  VERSUS RSD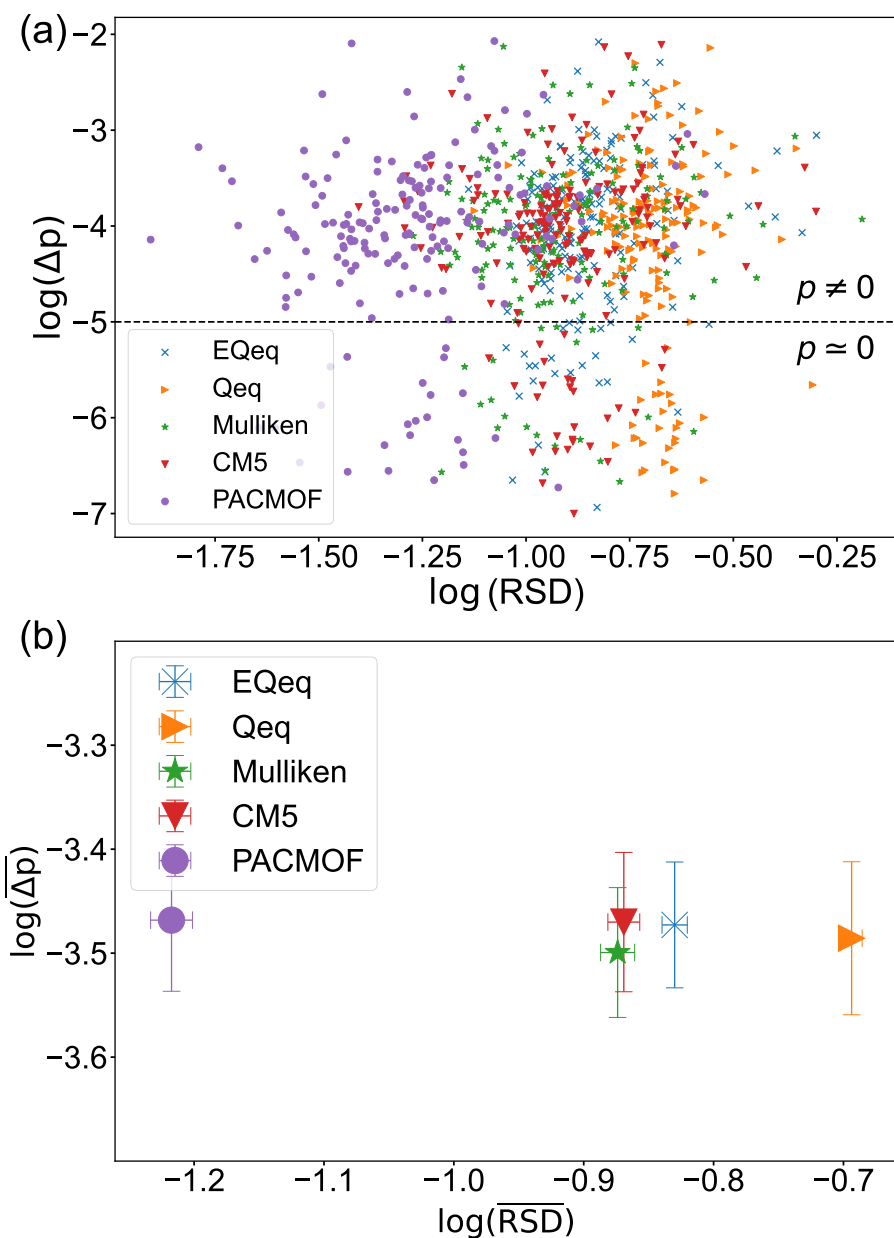

FIG. S4: The calculated  $\Delta p$  for the 181 MOFs are plotted against RSD in (a), where points based on different charges are labelled using distinct markers. The points in (b) locate at the coordinates of  $(\overline{\Delta p}, \overline{RSD})$  based on the five charge types, and the horizontal and the vertical bars at each point are standard error of  $\Delta p$  and RSD, respectively.
